# Supplementary material for: Characterization of Choline Nutriture among Adults and Children with Phenylketonuria
Source: MDPI journal article supplement (doi:10.3390/nu14194056), 2022-09-29
Supplement: s1 [file s1]

**Table S1.** Amount of Choline, Vitamin B12, Vitamin B6, Folic Acid, and Methionine found in 100g or 100mL of the Medical Foods Reported by Participants with PKU

| Medical Food                   | N <sup>1</sup> | Choline<br>(mg) | Vitamin B12<br>(mcg) | Vitamin B6<br>(mg) | Folic Acid<br>(mcg) | Methionine<br>(g) |
|--------------------------------|----------------|-----------------|----------------------|--------------------|---------------------|-------------------|
| Phenex-2                       | 28             | 100             | 5                    | 1.10               | 425                 | 0.60              |
| Phenylade MTE Amino Acid Blend | 10             | 0               | 0                    | 0                  | 0                   | 1.89              |
| Phenyl-free 2HP                | 5              | 67              | 3.10                 | 1.29               | 470                 | 0.88              |
| Phenyl-free 2                  | 4              | 98              | 2.40                 | 0.98               | 350                 | 0.48              |
| Phlexy-10 Drink Mix            | 4              | 0               | 0                    | 0                  | 0                   | 0.85              |
| Phenylade Amino Acid Blend     | 3              | 0               | 0                    | 0                  | 0                   | 1.95              |
| Phenylade 60                   | 3              | 425             | 4.20                 | 2.30               | 700                 | 1.45              |
| Glytactin RTD 15               | 3              | 82.4            | 0.30                 | 0.20               | 56                  | 0.06              |
| Glytactin Bettermilk           | 3              | 375             | 1.10                 | 1.50               | 200                 | 0.45              |
| PKU Periflex Advance           | 2              | 376             | 2.70                 | 1.40               | 430                 | 0.64              |
| Phenylade Essential            | 2              | 210             | 3                    | 1.40               | 300                 | 0.61              |
| Phenylade GMP Mix-In           | 2              | 0               | 0                    | 0                  | 0                   | 1.17              |
| PKU Cooler                     | 2              | 102             | 0.82                 | 0.44               | 51                  | 0.26              |
| PKU Maxamum                    | 1              | 430             | 3.10                 | 1.60               | 491                 | 0.87              |
| PKU Express                    | 1              | 530             | 4.30                 | 2.50               | 360                 | 1.24              |
| Phenylade 40                   | 1              | 284             | 2.80                 | 1.50               | 468                 | 1.08              |
| PKU Easy Microtabs             | 1              | 0               | 0                    | 0                  | 0                   | 1.42              |
| Camino Pro PKU                 | 1              | 95.5            | 0.90                 | 0.30               | 81.4                | 0.29              |

<sup>1</sup>Reflects the number of participants who reported taking a specific medical food. Participants who were consuming two or more medical foods were reported more than once.
